# Supplementary material for: An alcohol-free beer enriched with isomaltulose and a resistant dextrin modulates gut microbiome in subjects with type 2 diabetes mellitus and overweight or obesity: a pilot study
Source: Royal Society of Chemistry journal article supplement (doi:10.1039/d0fo03160g), 2021-01-01
Supplement: d0fo03160g1.pdf [file d0fo03160g1.pdf]

**Supplemental Table 1.** Clinical and biochemical characteristics at baseline according to dietary intervention sequence.<sup>1</sup>

|                                | Alcohol-free beer with regular composition → Alcohol-free beer with modified composition sequence<br>N = 8 | Alcohol-free beer with modified composition → Alcohol-free beer with regular composition sequence<br>N = 6 | <i>P</i> |
|--------------------------------|------------------------------------------------------------------------------------------------------------|------------------------------------------------------------------------------------------------------------|----------|
| Age, years                     | 55.5±7.82                                                                                                  | 57.0±3.90                                                                                                  | 0.676    |
| Gender, n (%) males            | 7 (87.5)                                                                                                   | 4 (66.7)                                                                                                   | 0.347    |
| Weight, kg                     | 95.9±13.2                                                                                                  | 93.0±14.6                                                                                                  | 0.707    |
| Waist circumference, cm        | 120 [105-23.0]                                                                                             | 110 [80.7-121]                                                                                             | 0.474    |
| Fat mass, kg                   | 26.5±6.72                                                                                                  | 37.5±23.1                                                                                                  | 0.249    |
| Fat free mass, kg              | 63.3±9.70                                                                                                  | 52.5±19.4                                                                                                  | 0.256    |
| Visceral fat, levels           | 13.3±2.43                                                                                                  | 20.5±20.2                                                                                                  | 0.421    |
| Systolic blood pressure, mmHg  | 135±15.1                                                                                                   | 130±12.7                                                                                                   | 0.505    |
| Diastolic blood pressure, mmHg | 82.7±7.79                                                                                                  | 83.4±10.7                                                                                                  | 0.894    |
| Metformin, n (%)               | 0                                                                                                          | 2 (33.3)                                                                                                   | 0.165    |
| Total cholesterol, mg/dL       | 200±15.8                                                                                                   | 206±24.6                                                                                                   | 0.537    |
| HDL cholesterol, mg/dL         | 50.6±7.13                                                                                                  | 59.5±11.3                                                                                                  | 0.096    |
| Triglycerides, mg/dL           | 98.6±33.6                                                                                                  | 73.0±16.6                                                                                                  | 0.114    |
| LDL cholesterol, mg/dL         | 129±12.4                                                                                                   | 132±26.4                                                                                                   | 0.769    |
| Apolipoprotein B, mg/dL        | 103±13.8                                                                                                   | 98.4±18.7                                                                                                  | 0.613    |
| Glucose, mg/dL                 | 107±14.3                                                                                                   | 105±13.2                                                                                                   | 0.819    |
| Insulin, mg/dL                 | 10.2±5.00                                                                                                  | 7.60±2.83                                                                                                  | 0.237    |
| HOMA-IR                        | 2.58±0.91                                                                                                  | 2.59±1.09                                                                                                  | 0.977    |
| HbA1c, %                       | 5.88±0.75                                                                                                  | 6.12±0.38                                                                                                  | 0.487    |
| GGT, U/L                       | 21.0 [16.8-34.0]                                                                                           | 24.5 [19.3-37.3]                                                                                           | 0.438    |
| AST, U/L                       | 31.0 [25.5-33.3]                                                                                           | 26.0 [20.0-38.5]                                                                                           | 0.297    |
| GPT, U/L                       | 27.4±7.93                                                                                                  | 29.2±16.0                                                                                                  | 0.786    |
| CRP, mg/dL                     | 0.09 [0.07-0.42]                                                                                           | 0.19 [0.14-0.35]                                                                                           | 0.698    |

<sup>1</sup> Values are expressed as mean±SD or median (25th percentile – 75th percentile) as applicable. AST denotes aspartate transaminase; CRP; C-reactive protein; GGT, gamma-

glutamyl transferase; GPT, gamma-glutamyl transaminase; HbA1c, glycated hemoglobin; HOMA-IR, Homeostasis model assessment of insulin resistance.

<sup>2</sup>*P* refers to differences within each beer intervention period calculated by  $\chi^2$  test, *t*-test or Mann-Whitney U test as applicable.
