# Supplementary material for: An alcohol-free beer enriched with isomaltulose and a resistant dextrin modulates gut microbiome in subjects with type 2 diabetes mellitus and overweight or obesity: a pilot study
Source: Royal Society of Chemistry journal article supplement (doi:10.1039/d0fo03160g), 2021-01-01
Supplement: d0fo03160g2.pdf [file d0fo03160g2.pdf]

**Supplemental table 2.** Dietary characteristics at baseline and after intervention of each type of beer in those subjects in which microbiome was analysed.<sup>1</sup>

| Intake per day                 | Alcohol-free beer with regular composition<br>N =14 |                    |                        |                       | Alcohol-free beer with modified composition<br>N =14 |                       |                       |                       |
|--------------------------------|-----------------------------------------------------|--------------------|------------------------|-----------------------|------------------------------------------------------|-----------------------|-----------------------|-----------------------|
|                                | Baseline                                            | Intermediate visit | After intervention     | <i>P</i> <sup>2</sup> | Baseline                                             | Intermediate visit    | After intervention    | <i>P</i> <sup>2</sup> |
| Energy, kcal                   | 1681±287                                            | 1575±360           | 1594±242               | 0.528                 | 1696± 260                                            | 1496±274 <sup>c</sup> | 1718±267 <sup>b</sup> | 0.046                 |
| Carbohydrates, %               | 35.7±6.7                                            | 37.9±8.33          | 37.8±6.21              | 0.542                 | 37.1±9.77                                            | 37.6±8.07             | 35.4±6.71             | 0.745                 |
| Sugars, g                      | 70.2±18.3                                           | 66.8±18.4          | 59.7±18.3              | 0.255                 | 70.7±22.8                                            | 68.3±18.3             | 74.4±18.6             | 0.519                 |
| Fiber, g                       | 26.9±9.20 <sup>c</sup>                              | 28.2±11.5          | 21.5±6.34 <sup>a</sup> | 0.007                 | 25.9±7.01                                            | 24.4±6.41             | 27.2±8.38             | 0.487                 |
| Fat, %                         | 36.5±7.73                                           | 35.2±7.84          | 37.0±7.73              | 0.668                 | 34.5±8.32                                            | 34.9±9.50             | 38.1±8.91             | 0.406                 |
| Saturated fatty acids, %       | 9.65±4.40                                           | 8.71±3.24          | 10.1±3.47              | 0.334                 | 9.27±1.90                                            | 8.85±2.41             | 9.96±2.93             | 0.317                 |
| Monounsaturated fatty acids, % | 18.2±4.62                                           | 16.2±5.49          | 17.5±5.03              | 0.412                 | 17.2±6.14                                            | 17.6±8.12             | 19.4±6.70             | 0.580                 |
| Polyunsaturated fatty acids, % | 5.06±2.31                                           | 5.44±3.50          | 5.38±2.09              | 0.787                 | 4.28±1.22                                            | 4.16±1.71             | 4.93±1.59             | 0.302                 |
| Cholesterol, mg                | 368±231                                             | 374±251            | 355±177                | 0.961                 | 331±221                                              | 382±308               | 303±114               | 0.658                 |
| Protein, %                     | 95.8±19.4                                           | 87.9±21.1          | 87.0±14.3              | 0.709                 | 98.3±22.5                                            | 90.4±32.7             | 91.4±24.6             | 0.577                 |
| Sodium, mg                     | 2136±687                                            | 2060±792           | 2252±799               | 0.773                 | 2259±1080                                            | 2150±1424             | 2404±810              | 0.769                 |

<sup>1</sup> Values are mean±SD and are expressed as intake per day. <sup>2</sup>*P* refers to differences within each alcohol-free beer intervention period calculated by one-way ANOVA with repeated measures; *post-hoc* analysis by Bonferroni was carried out if applicable. “a” denotes  $P < 0.05$  comparing to baseline, “b” denotes  $P < 0.05$  comparing to intermediate visit, “c” denotes  $P < 0.05$  comparing to final visit.
